# Supplementary material for: Synthesis and photo- and electroluminescence properties of 3,6-disubstituted phenanthrenes: alternative host material for blue fluorophores
Source: Royal Society of Chemistry journal article supplement (doi:10.1039/c1cc12875b), 2011-01-01
Supplement: c1cc12875b.pdf [file c1cc12875b.pdf]

## Supporting Information

### Synthesis and photo- and electroluminescence properties of 3,6-disubstituted phenanthrenes: alternative host material for blue fluorophores

Yu-Han Chen, Ho-Hsiu Chou, Tsu-Hui Su, Pei-Yu Chou, Fang-Iy Wu and  
Chien-Hong Cheng\*

Department of Chemistry, National Tsing Hua University, Hsinchu 30043,  
Taiwan. e-mail: [chcheng@mx.nthu.edu.tw](mailto:chcheng@mx.nthu.edu.tw)

#### Contents:

|                                                                                                    |         |
|----------------------------------------------------------------------------------------------------|---------|
| 1. Experimental Section -----                                                                      | S2      |
| 2. Absorption and emission spectra of TPhP, TNaP and TPyP in CH <sub>2</sub> Cl <sub>2</sub> ----- | S8      |
| 3. Cyclic voltammograms of TPhP, TNaP and TPyP-----                                                | S8      |
| 4. Calculated HOMO and LUMO density maps of TPhP, TNaP and TPyP-----                               | S9      |
| 5. TGA thermograms of TPhP, TNaP and TPyP-----                                                     | S9      |
| 6. DSC thermograms of TNaP and TPyP-----                                                           | S10     |
| 7. AFM of TPyP doped with 5% BCzVBi-----                                                           | S11     |
| 8. The L-I-V curves of devices, EL spectra, and the operational lifetime of devices---<br>-----    | S11-S12 |
| 9. <sup>1</sup> H and <sup>13</sup> C NMR spectra-----                                             | S13-S15 |

## Experimental Section

### General Information.

$^1\text{H}$  and  $^{13}\text{C}$  NMR spectra were carried out on a Bruker AV-400 MHz NMR spectrometer. Mass spectra were determined using a JMS-700 HRMS instrument. UV-Vis spectra were recorded on a Hitachi U-3300 model, while PL spectra were performed on a Hitachi F-4500 fluorescence spectrophotometer. The TGA and DSC measurements were carried out using TA Instruments Q50 and Q20 at a speed of 20 and 10 °C/min under a nitrogen gas atmosphere, respectively. The PL quantum yields of the vacuum deposited films (30 nm) were determined by the integrating sphere method using a Labsphere SP-150M equipment.

The HOMO and LUMO levels were estimated from the oxidation potential ( $E_{1/2}$ ) in  $\text{CH}_2\text{Cl}_2$  and the reduction potential ( $E_{1/2}$ ) in THF solution at  $10^{-3}$  M obtained from the cyclic voltammetry (CV) measurement with Pt wire as the counter electrode, Pt/(Au/Hg) electrodes as working electrode. The potentials were measured against an  $\text{Ag}/\text{Ag}^+$  ( $\text{Ag}/0.01$  M  $\text{AgNO}_3$ ) reference electrode. The final results were calibrated with the ferrocene/ferrocenium ( $\text{Fc}/\text{Fc}^+$ ) couple. Under the assumption that the energy level of ferrocene/ferrocenium is 4.8 eV below vacuum, the HOMO and LUMO levels of phenanthrene derivatives were determined from the equation:  $-(4.8 \text{ eV} + E_{1/2}$  (versus  $\text{Fc}/\text{Fc}^+$ )). The energy gap ( $E_g$ ) was estimated by subtracting the LUMO energy level from the HOMO energy level.

The molecular geometry optimizations and electronic properties were computed by carrying out the Gaussian 03 program with density functional theory (DFT) and time-dependent DFT (TDDFT) calculations, in which the Becke's three-parameter functional combined with Lee, Yang, and Parr's correlation functional (B3LYP) hybrid exchange-correlation functional with the 6-31G\* basic set were used. The molecular orbitals were visualized on the Gaussview 4.1 software.

The current density-voltage-luminance measurements were recorded on a Keithley model 2400 source meter and a Newport 1835-C optical meter equipped with a Newport 818-ST silicon photodiode. The EL spectra were recorded with a Hitachi F-4500 fluorescence spectrophotometer.

### Synthesis of phenanthrene derivatives:

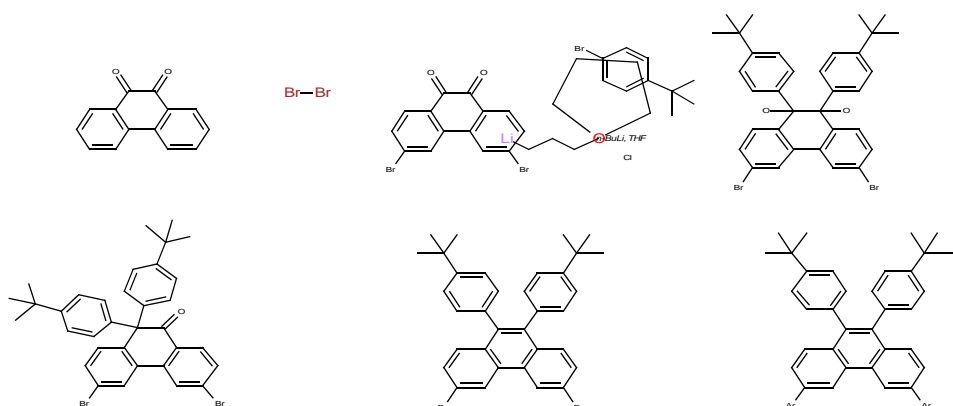

### Procedures for the synthesis of phenanthrene derivatives<sup>1</sup>:

The reaction involves the addition of two 4-*tert*-butylphenyl lithium to dibromodione **1** to give diol **2** followed by a skeleton rearrangement to provide ketone **3**. Reduction with LiAlH<sub>4</sub> and the subsequent dehydration led to product **4**. Further treatment of phenanthrene derivatives with phenyl-, 2-naphthyl- and 1-pyrenylboronic acid under Suzuki coupling conditions afforded TPhP, TNaP and TPyP, respectively.

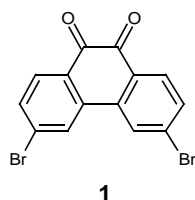

*3,6-Dibromophenanthrene-9,10-dione* (**1**): Phenanthrenequinone (1.0 g, 4.80 mmol), Br<sub>2</sub> (1.0 mL, 19.7 mmol), and benzoyl peroxide (100 mg) were added to nitrobenzene (15.0 mL). The mixture was exposed to a 300 W tungsten lamp for 1 h. After 30 min, the mixture was cooled to room temperature and filtered. The crude product was washed with MeOH and Et<sub>2</sub>O, and dried under vacuum to give **1** (1.47 g, 84%). <sup>1</sup>H NMR (400 MHz, CDCl<sub>3</sub>): δ 8.10 (d, *J* = 1.6 Hz, 2H), 8.05 (d, *J* = 8.4 Hz, 2H), 7.65 (dd, *J* = 7.2 Hz, *J* = 1.6, 2H). <sup>13</sup>C NMR (100 MHz, CDCl<sub>3</sub>): δ 178.2, 153.9, 133.4, 132.1, 129.9, 127.4. HRMS (*m/z*): [*M*<sup>+</sup>] calcd. for C<sub>14</sub>H<sub>6</sub>Br<sub>2</sub>O<sub>2</sub>, 363.8735; found 363.87130.

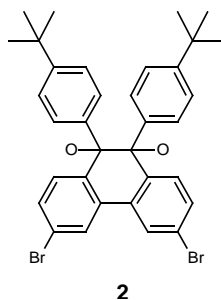

*3,6-Dibromo-9,10-bis(4-tert-butylphenyl)-9,10-dihydrophenanthrene-9,10-diol (2)*: *n*-Butyllithium in hexane (2.5 M, 16.8 mL) was added slowly under nitrogen to a solution of 1-bromo-4-*tert*-butylbenzene (8.52 g, 40.0 mmole) in anhydrous THF (60 mL) at -78 °C. The mixture was stirred for 30 min at -78 °C and then a solution of 3,6-dibromophenanthrene-9,10-dione (3.66 g, 10.0 mmole) in anhydrous THF (100 mL) was added dropwise. This mixture was cooled to room temperature and stirred overnight. Thereafter, the reaction mixture was quenched with aqueous HCl (2.0 M, 10 mL) and extracted with CH<sub>2</sub>Cl<sub>2</sub> (2 × 50 mL). The collected organic phase was dried over MgSO<sub>4</sub> and concentrated under reduced pressure. The residue was purified through a silica gel column (CH<sub>2</sub>Cl<sub>2</sub>/*n*-Hexane = 1:4) to give **1** (2.85 g, 45%). <sup>1</sup>H NMR (400 MHz, CDCl<sub>3</sub>): δ 7.97 (d, *J* = 1.6 Hz, 2H), 7.39-7.34 (m, 4H), 7.29-7.26 (m, 4H), 7.21-7.19 (m, 4H), 2.26 (s, 2H), 1.21 (s, 18H). <sup>13</sup>C NMR (100 MHz, CDCl<sub>3</sub>): δ 150.8, 141.0, 136.2, 134.3, 132.4, 129.0, 127.3, 126.0, 125.4, 122.8, 80.4, 34.4, 31.1. HRMS (*m/z*): [*M*<sup>+</sup>] calcd. for C<sub>34</sub>H<sub>34</sub>Br<sub>2</sub>O<sub>2</sub> 632.0926; found 632.0923.

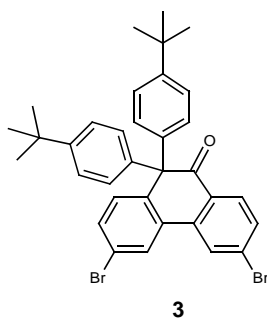

*3,6-Dibromo-10,10-bis(4-tert-butylphenyl)phenanthren-9(10H)-one (3)*: A solution of HCl (12 M, 11.0 mL) in AcOH (25 mL) was added dropwise to a solution of **1** (16.0 g, 25.2 mmol) in AcOH (75 mL). The mixture was heated under reflux for 30 min and was then poured into cold water. The mixture was extracted with CH<sub>2</sub>Cl<sub>2</sub> (100 mL). The combined organic layer was washed with H<sub>2</sub>O (100 mL × 2), saturated NaHCO<sub>3</sub> (100 mL × 2) aqueous solution and dried with anhydrous MgSO<sub>4</sub>. The crude product was purified through a silica gel column (CH<sub>2</sub>Cl<sub>2</sub>/*n*-hexane = 1:6) to give **2** (13.6 g, 87%). <sup>1</sup>H NMR (400 MHz, CD<sub>2</sub>Cl<sub>2</sub>): δ 8.11 (s, 1H), 8.06 (s, 1H), 7.81 (d, *J* = 7.2 Hz, 1H), 7.54 (d, *J* = 7.6 Hz, 1H), 7.41 (d, *J* = 7.6 Hz, 1H), 7.27 (d, *J* = 7.6 Hz,

4H), 6.81 (d,  $J = 7.6$  Hz, 4H), 6.67 (d,  $J = 8.8$  Hz, 1H), 1.28 (s, 18H).  $^{13}\text{C}$  NMR (100 MHz,  $\text{CD}_2\text{Cl}_2$ ):  $\delta$  198.7, 150.4, 141.0, 137.9, 136.9, 134.0, 132.1, 132.0, 131.8, 130.0, 129.6, 129.4, 128.9, 127.1, 126.1, 125.2, 122.1, 67.1, 34.4, 31.3. HRMS ( $m/z$ ): [ $\text{M}^+$ ] calcd. for  $\text{C}_{34}\text{H}_{32}\text{Br}_2\text{O}$ , 614.0820; found 614.0812.

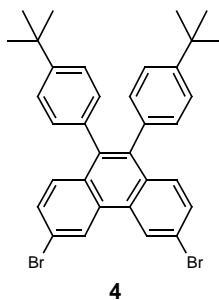

**3,6-Dibromo-9,10-bis(4-tert-butylphenyl)phenanthrene (4):** Compound **2** (13.6 g, 22.06 mmol) was dissolved in anhydrous THF (100 mL) and degassed with nitrogen. To the mixture was added  $\text{LiAlH}_4$  (1.47 g, 38.8 mmol) and the mixture was refluxed under nitrogen for 2 h, cooled to room temperature, quenched with dilute HCl (2.0M, 10 mL) in an ice bath and extracted with  $\text{CH}_2\text{Cl}_2$  (100 mL  $\times$  2). The collected organic layer was dried over  $\text{MgSO}_4$  and concentrated under reduced pressure. Then the residue was dissolved in an acetic acid solution (200 mL) and refluxed for 2 h. The reaction mixture was cooled and then extracted with  $\text{CH}_2\text{Cl}_2$  (100 mL). The organic layer was washed with  $\text{H}_2\text{O}$  (100 mL  $\times$  2), saturated  $\text{NaHCO}_3$  (100 mL  $\times$  2) aqueous solution and dried with anhydrous  $\text{MgSO}_4$ . The crude product was purified by using column chromatography with *n*-hexane as the eluent to afford **3** (12.5 g, 94%).  $^1\text{H}$  NMR (400 MHz,  $\text{CDCl}_3$ ):  $\delta$  8.80 (s, 2H), 7.56 (s, 4H), 7.18 (d,  $J = 8.0$  Hz, 4H), 6.95 (d,  $J = 8.0$  Hz, 4H), 1.24 (s, 18H).  $^{13}\text{C}$  NMR (100 MHz,  $\text{CDCl}_3$ ):  $\delta$  149.5, 137.7, 135.6, 130.9, 130.5, 130.4, 130.2, 129.8, 125.3, 124.3, 121.1, 34.4, 31.3. HRMS ( $m/z$ ): [ $\text{M}^+$ ] calcd. for  $\text{C}_{34}\text{H}_{32}\text{Br}_2$ , 598.0871; found 598.0863.

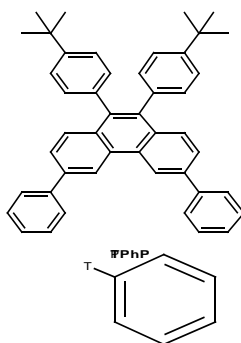

**3,6-Diphenyl-9,10-bis(4-tert-butylphenyl)phenanthrene (TPhP):** Phenylboronic acid (1.35 g, 4.50 mmol), 3,6-dibromo-9,10-bis(4-tert-butylphenyl)phenanthrene (**3**) (1.00

g, 1.84 mmol), aqueous  $K_2CO_3$  (2.0 M, 10 mL), tetrakis (triphenylphosphine)palladium (*ca.* 213 mg), and toluene (30 mL) was mixed in a flask and refluxed under nitrogen for 24 h. The reaction mixture was cooled to room temperature and then extracted with  $CH_2Cl_2$  (100 mL  $\times$  2). The combined organic layers were washed with  $H_2O$  (100 mL  $\times$  2) and dried with anhydrous  $MgSO_4$ . The crude product was purified through a silica gel column ( $CH_2Cl_2/n$ -hexane, 1:20) to afford TPhP as a white powder (0.862 g, 78%).  $^1H$  NMR (400 MHz,  $CDCl_3$ ):  $\delta$  9.05 (d,  $J = 1.2$  Hz, 2H), 7.81-7.79 (m, 6H), 7.74 (dd,  $J = 8.4$ ,  $J = 1.6$  Hz, 2H), 7.53 (t,  $J = 7.6$  Hz, 4H), 7.41 (t,  $J = 7.2$  Hz, 2H), 7.22 (d,  $J = 8.0$  Hz, 4H), 7.06 (d,  $J = 8.4$  Hz, 4H), 1.28 (s, 18H).  $^{13}C$  NMR (100 MHz,  $CDCl_3$ ):  $\delta$  149.1, 141.5, 139.1, 137.5, 136.4, 131.4, 130.7, 130.3, 128.9, 128.6, 127.7, 127.4, 126.0, 124.2, 121.0, 34.4, 31.3. HRMS ( $m/z$ ):  $[M^+]$  calcd. for  $C_{46}H_{42}$ , 594.3287; found, 594.3276. Anal. calcd for  $C_{46}H_{42}$ : C, 92.88; H, 7.12; found: C, 92.82; H, 7.18.

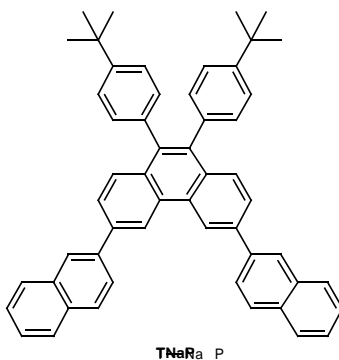

*3,6-Di(naphthalen-2-yl)-9,10-bis(4-tert-butylphenyl)phenanthrene* (TNaP): Prepared as a white solid (0.463 g, 80%) according to a procedure similar to the above one by using 2-naphthylboronic acid as one of the reagents.  $^1H$  NMR (400 MHz,  $CDCl_3$ ):  $\delta$  9.21 (d,  $J = 0.8$  Hz, 2H), 8.25 (s, 2H), 8.01-7.95 (m, 6H), 7.92-7.84 (m, 6H), 7.55- 7.48 (m, 4H), 7.24 (d,  $J = 8.4$  Hz, 4H), 7.09 (d,  $J = 8.4$  Hz, 4H), 1.29 (s, 18H).  $^{13}C$  NMR (100 MHz,  $CDCl_3$ ):  $\delta$  149.1, 139.0, 138.9, 137.6, 136.5, 133.8, 132.7, 131.5, 130.8, 130.4, 128.7, 128.6, 128.3, 127.7, 126.4, 126.3, 126.3, 126.1, 126.0, 124.2, 121.3, 34.4, 31.3. HRMS ( $m/z$ ):  $[M^+]$  calcd. for  $C_{54}H_{46}$ , 694.3600; found, 694.3604. Anal. calcd for  $C_{54}H_{46}$ : C, 93.33; H, 6.67; found: C, 93.16; H, 6.77.

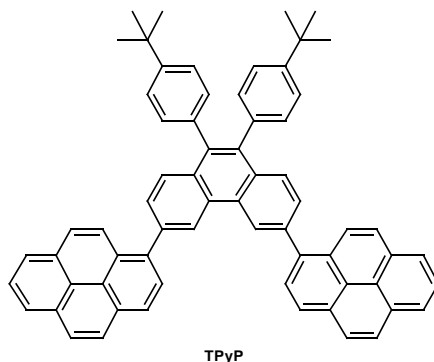

*3,6-Di(pyrene-1-yl)-9,10-bis(4-tert-butylphenyl)phenanthrene* (TPyP): Prepared as a white solid (0.518 g, 74%) according to procedure similar to the above one by using 1-pyreneboronic acid as one of the reagents.  $^1\text{H}$  NMR (400 MHz,  $\text{CDCl}_3$ ):  $\delta$  9.08 (d,  $J = 1.6$  Hz, 2H), 8.26 (d,  $J = 9.2$  Hz, 2H), 8.21 (d,  $J = 8.0$  Hz, 2H), 8.15 (d,  $J = 8.0$  Hz, 2H), 8.10 (d,  $J = 8.0$  Hz, 4H), 8.06 (s, 4H), 7.99-7.95 (m, 6H), 7.82 (dd,  $J = 8.2$ ,  $J = 1.4$  Hz, 2H), 7.29 (d,  $J = 8.4$  Hz, 4H), 7.20 (d,  $J = 8.4$  Hz, 4H), 1.30 (s, 18H).  $^{13}\text{C}$  NMR (100 MHz,  $\text{CDCl}_3$ ):  $\delta$  149.2, 139.2, 137.8, 136.5, 131.5, 131.4, 130.9, 130.8, 130.7, 130.0, 129.4, 128.7, 128.0, 127.9, 127.7, 127.5, 127.4, 126.0, 125.3, 125.1, 125.0, 124.8, 124.8, 124.7, 124.5, 124.3, 34.5, 31.3. HRMS ( $m/z$ ):  $[\text{M}^+]$  calcd. for  $\text{C}_{66}\text{H}_{50}$ , 842.3913; found, 842.3926. Anal. calcd for  $\text{C}_{66}\text{H}_{50}$ : C, 94.02; H, 5.98; found: C, 94.01; H, 5.96.

#### References:

- (a) H. J. Kim, E. Lee, H. S. Park and M. Lee, *J. Am. Chem. Soc.*, 2007, **129**, 10994; (b) Y. Shirai, A. J. Osgood, Y. Zhao, Y. Yao, L. Saudan, H. Yang, Y. H. Chiu, L. B. Alemany, T. Sasaki, J. F. Morin, J. M. Guerrero, K. F. Kelly and J. M. Tour. *J. Am. Chem. Soc.*, 2006, **128**, 4854; (c) B. He, H. Tian, Y. Geng, F. Wang and K. Müllen, *Org. Lett.*, 2008, **10**, 773; (d) H. Kurata, Y. Takehara, T. Kawase, and M. Oda, *Chemistry Letters*, 2003, **32**, 538; (e) Y. H. Lai, *J. Chem. Soc. Perkin Trans. II*, 1986, 1667.

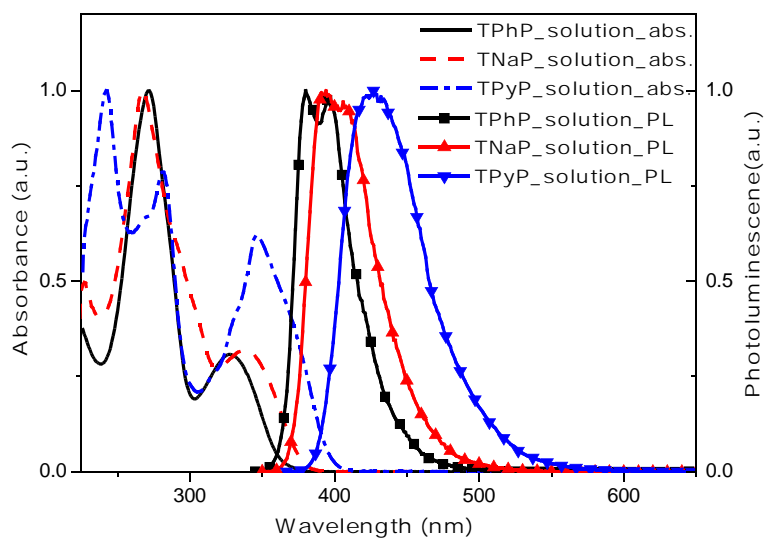

**Fig S1.** Absorption and emission spectra of TPhP, TNaP and TPyP in dichloromethane at concentration =  $1.0 \times 10^{-5}$  M.

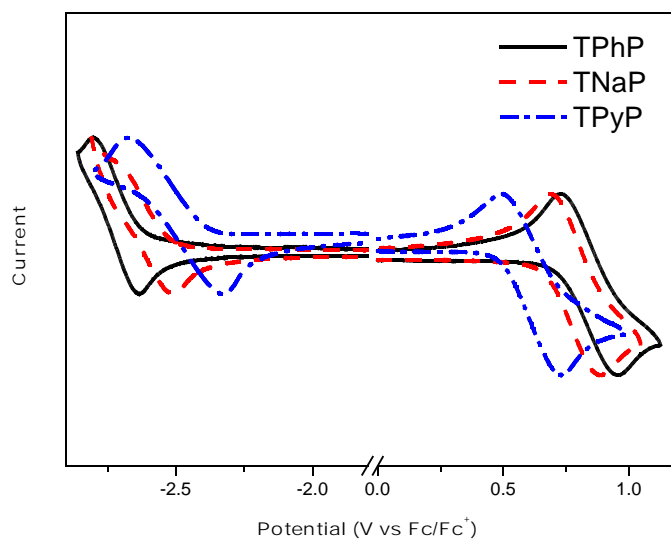

**Fig S2.** Cyclic voltammograms of TPhP, TNaP and TPyP.

**Table S1.** The  $E_{1/2}^{ox}$  and  $E_{1/2}^{re}$  (versus Fc/Fc<sup>+</sup>) of phenanthrene derivatives.

| Compound | $E_{1/2}^{ox}$ (eV) | $E_{1/2}^{re}$ (eV) |
|----------|---------------------|---------------------|
| TPhP     | 1.0                 | -2.7                |
| TNaP     | 0.9                 | -2.6                |
| TPyP     | 0.8                 | -2.5                |



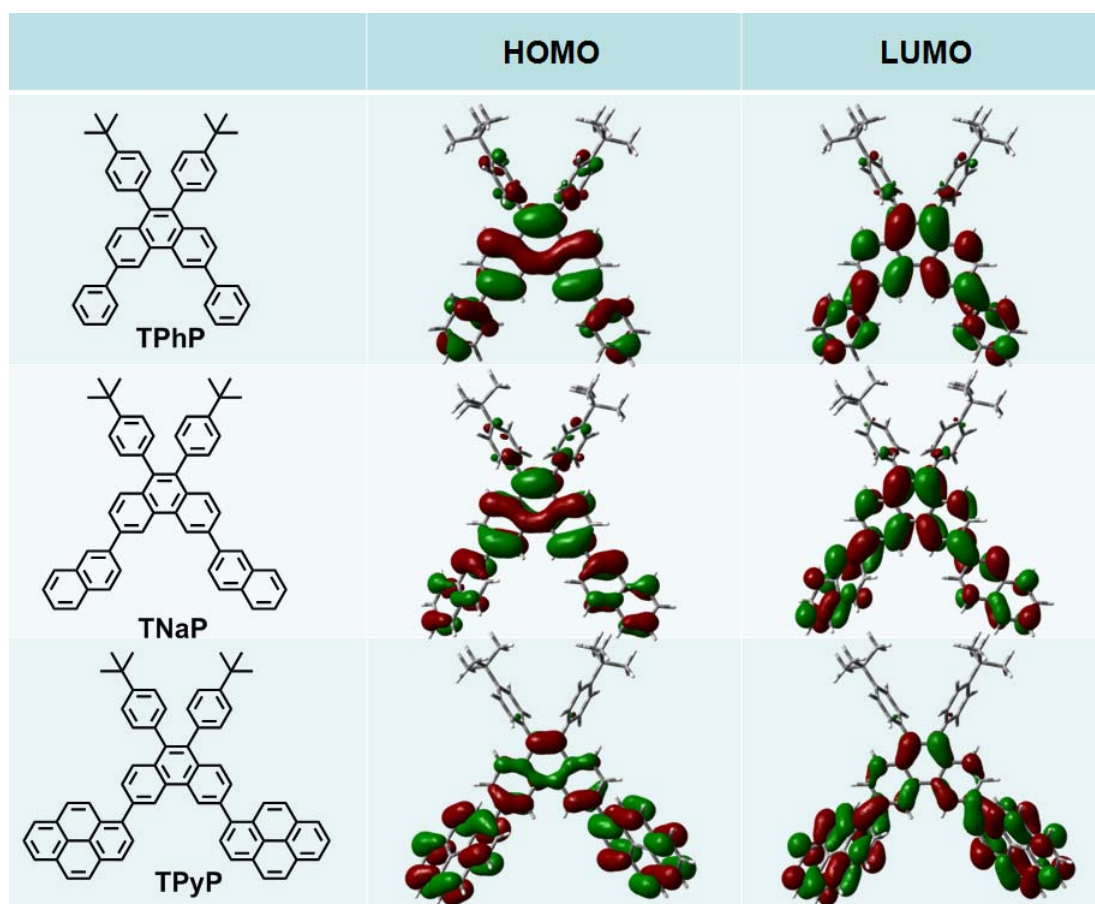

**Fig S3.** Calculated HOMO and LUMO density maps of TPhP, TNaP and TPyP.

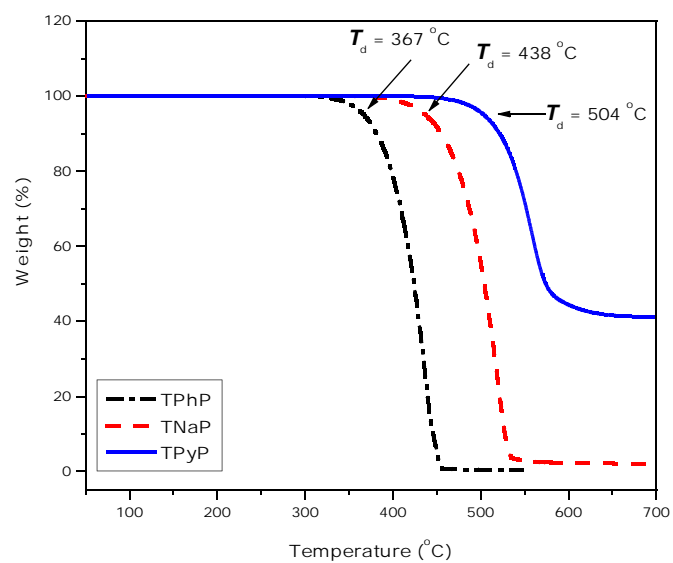

**Fig S4.** TGA thermograms of TPhP, TNaP and TPyP.

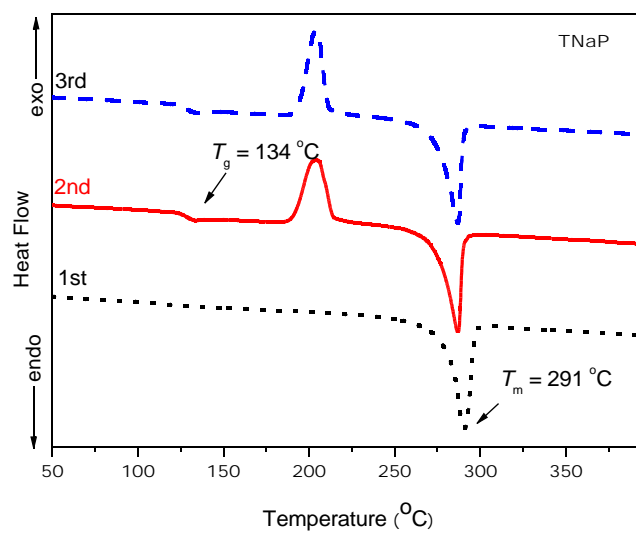

**Fig S5.** DSC thermograms of TNaP.

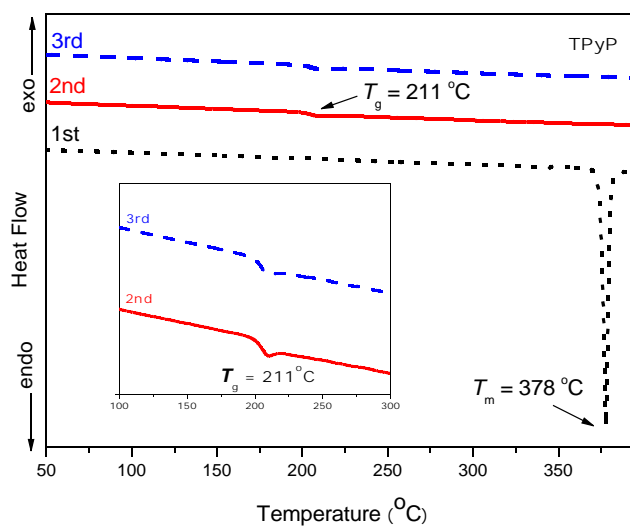

**Fig S6.** DSC thermograms of TPyP.

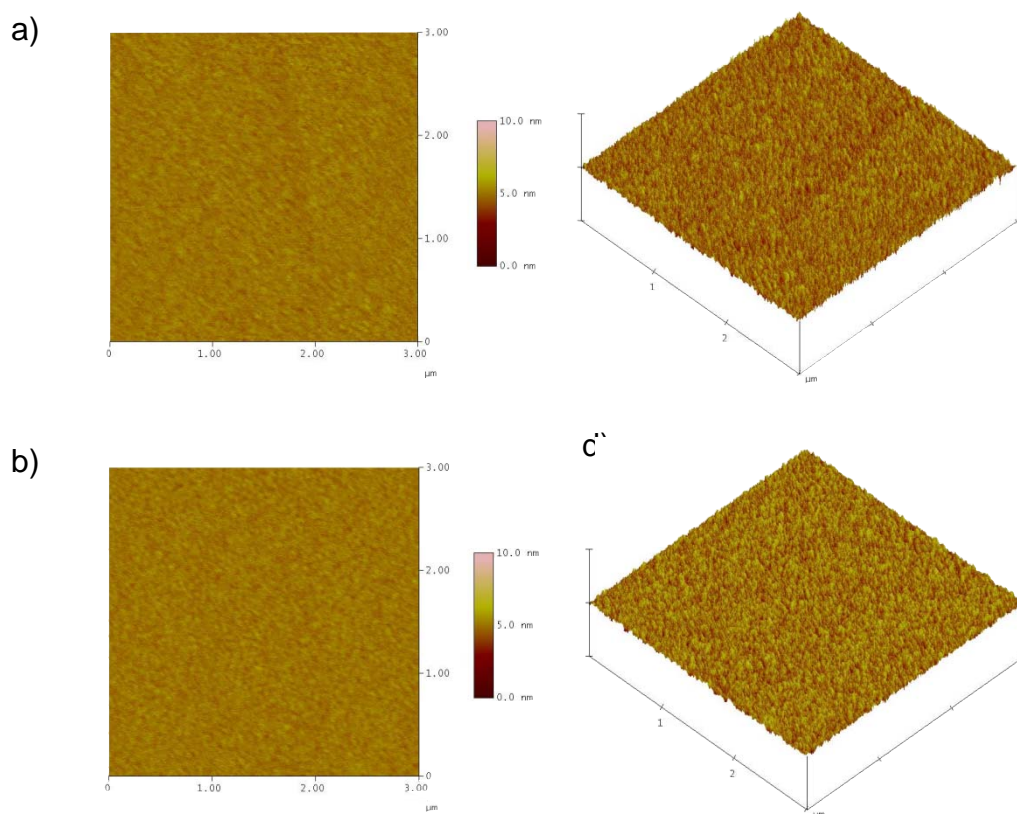

**Fig S7.** AFM topographic images (top and angled views) of TPyP doped with 5% BCzVBi. (a) TPyP without annealing; (b) after annealing at 110 °C for 18 h under one nitrogen atmosphere. (the root-mean-square roughness values of (a) and (b) are 0.237 and 0.220, respectively).

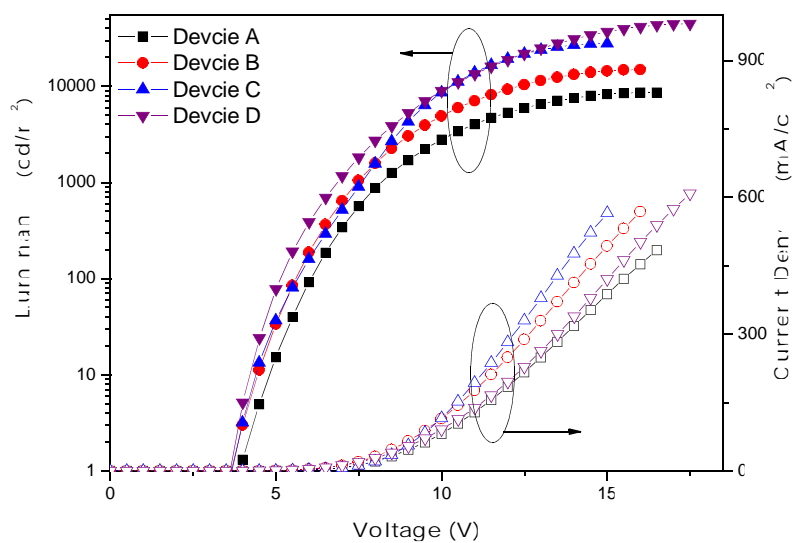

**Fig S8.** The voltage versus luminance and current density curves of devices A-D.

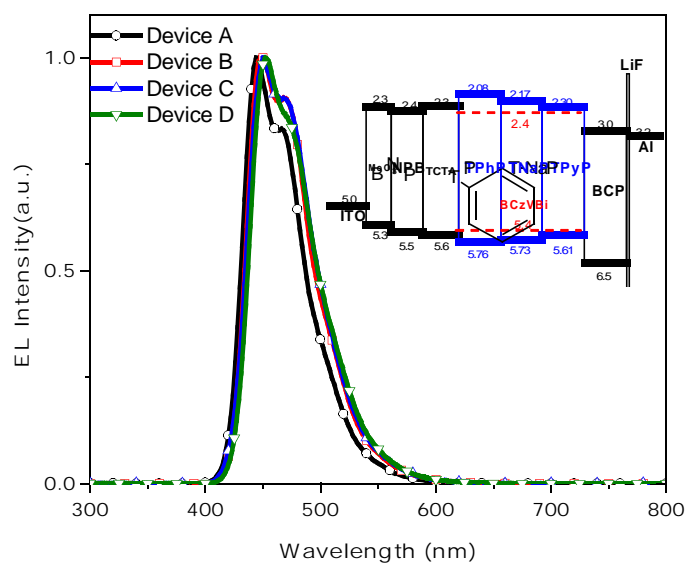

**Fig S9.** The EL spectra of devices A-D. Inset: Schematic energy diagram of the materials in the devices.

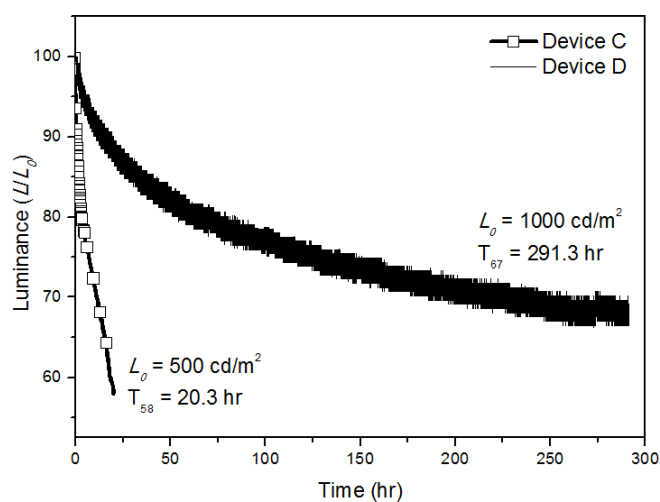

**Fig S10.** The  $L/L_0$  versus operation time of devices C and D, where  $L$  is luminance and  $L_0$  is the luminance at time = 0.

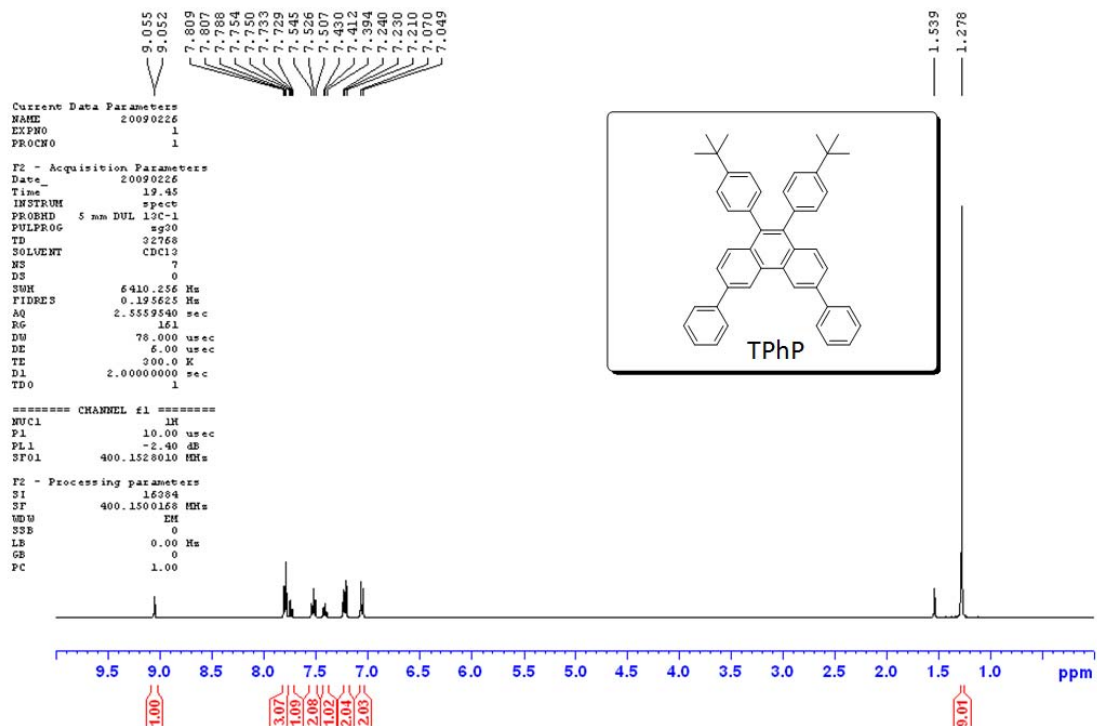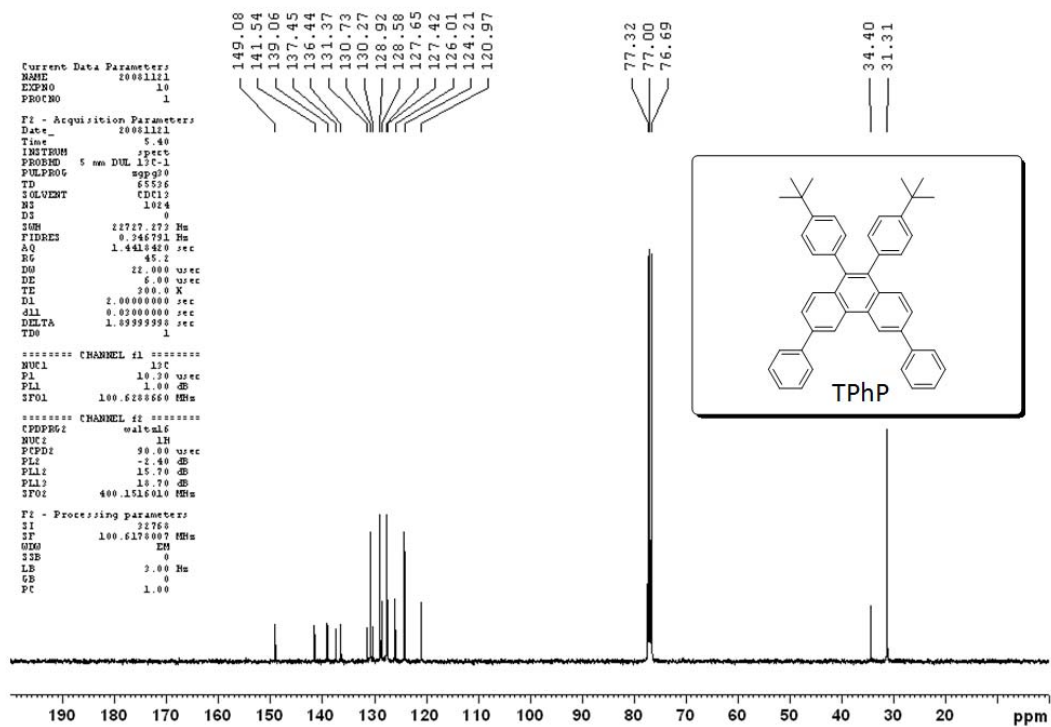

Fig S11. <sup>1</sup>H and <sup>13</sup>C NMR spectra of TPhP.

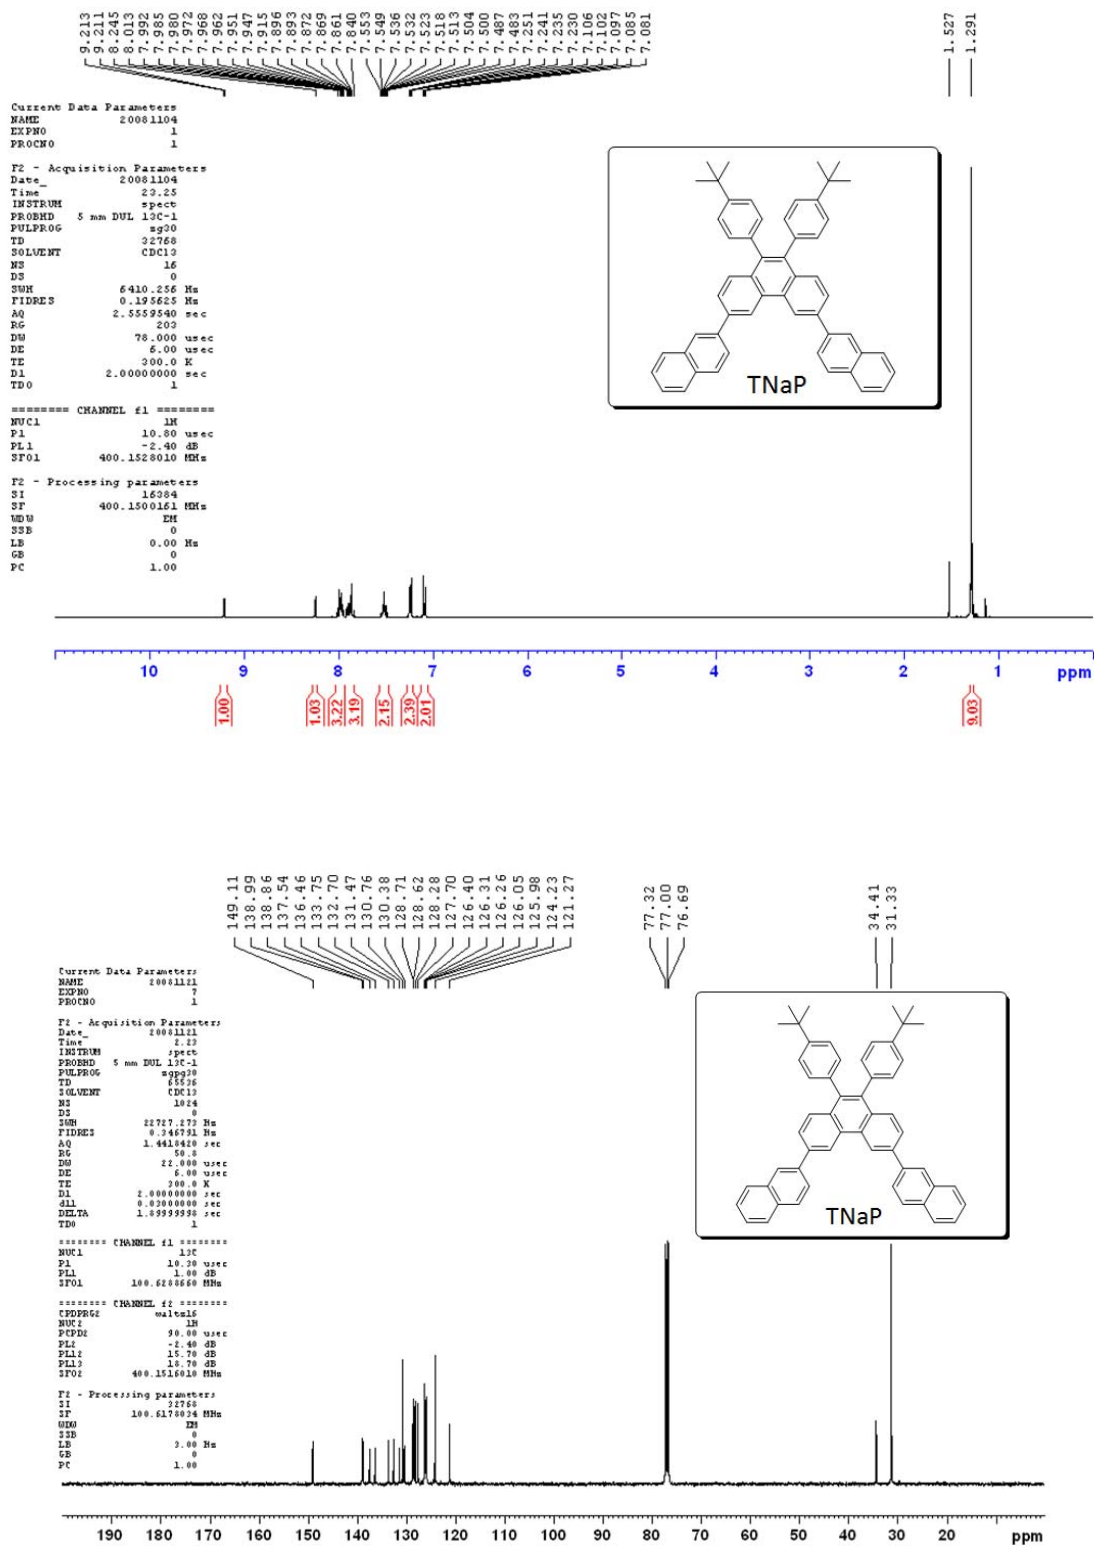

Fig S12. <sup>1</sup>H and <sup>13</sup>C NMR spectra of TNaP.

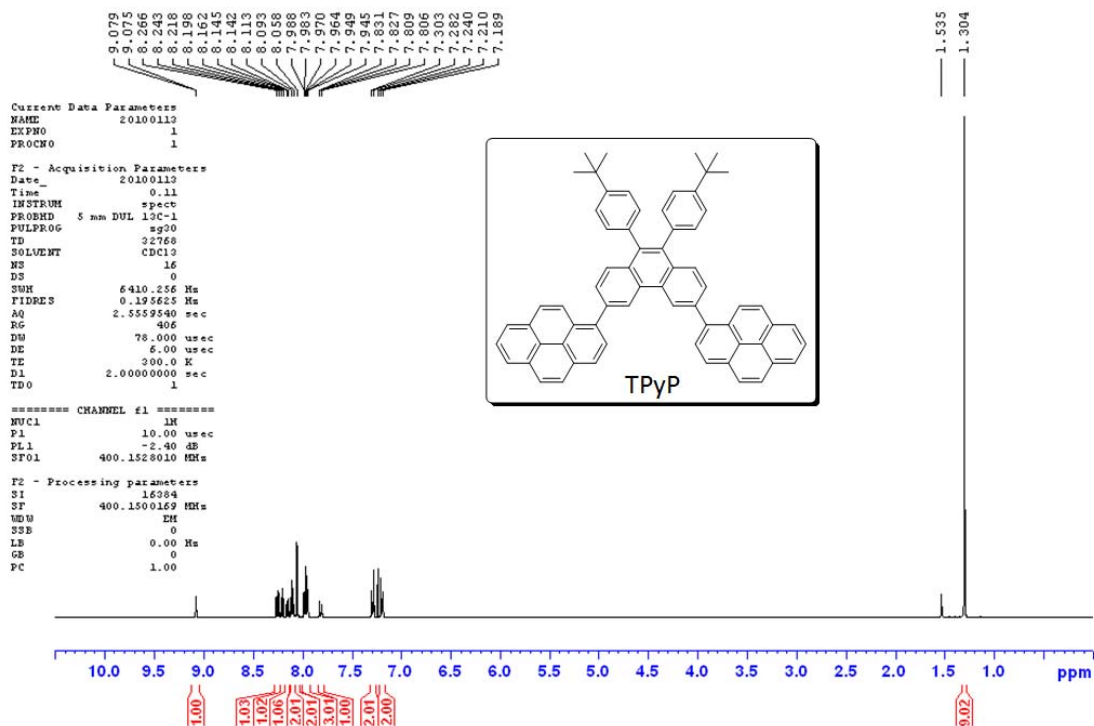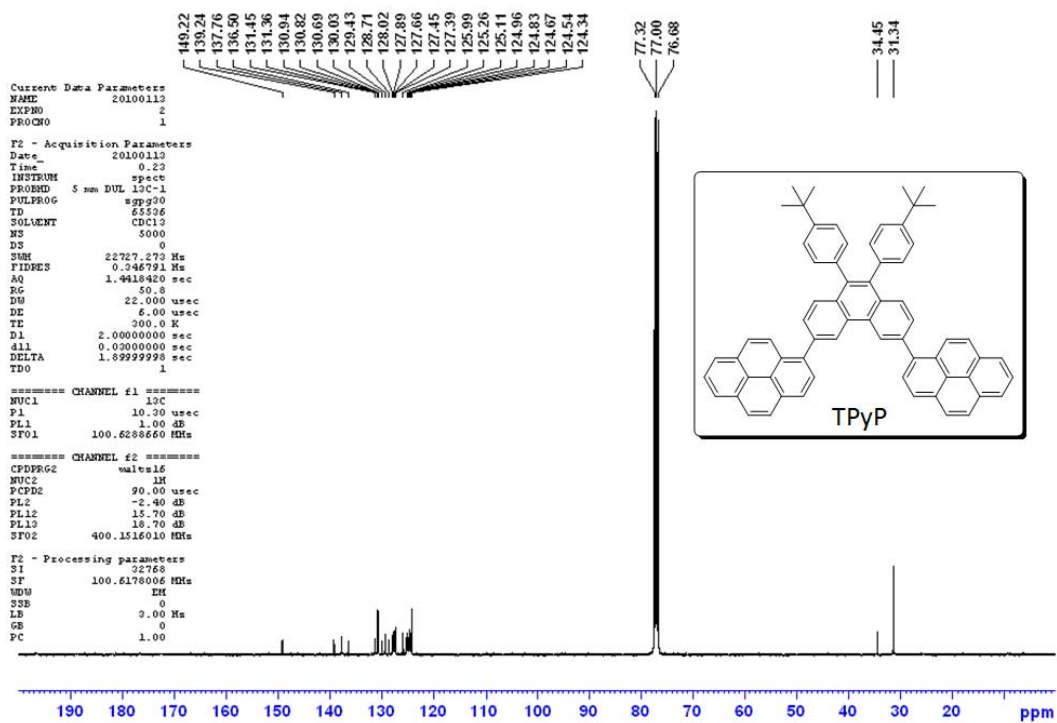

Fig S13. <sup>1</sup>H and <sup>13</sup>C NMR spectra of TPyP.
